# Supplementary material for: Spatial Learning and Memory in the Naked Mole-Rat: Evolutionary Adaptations to a Subterranean Niche
Source: Frontiers journal article supplement (doi:10.3389/fevo.2022.879989), 2022-06-16
Supplement: Table_1.XLSX [file Table_1.XLSX]

## Sheet: Sheet1
Colony	Factors	Test	Measure	Trial Contrasts	Mean Difference*	F	df	Error df	Std. Error	Sig.	Observed Power
Combined	Trial	Multivariate				3.074	28	588		<0.001	1
		Univariate	Latency			4.717	14	294		<0.001	1
		Post-hoc		T1 v T2	82.345 s				25.918 s	0.476
		Post-hoc		T1 v T3	160.164 s				20.856 s	<0.001
		Post-hoc		T1 v T4	167.244 s				25.092 s	<0.001
		Post-hoc		T1 v T5	184.305 s				20.872 s	<0.001
		Post-hoc		T1 v T6	186.007 s				22.050 s	<0.001
		Post-hoc		T1 v T7	192.972 s				20.289 s	<0.001
		Post-hoc		T1 v T8	186.409 s				21.064 s	<0.001
		Post-hoc		T1 v T9	183.263 s				22.839 s	<0.001
		Post-hoc		T1 v T10	197.287 s				18382 s	<0.001
		Post-hoc		T1 v T11	177.648 s				23.305 s	<0.001
		Post-hoc		T1 v T12	210.669 s				21.016 s	<0.001
		Post-hoc		T1 v T13	207.675 s				21.556 s	<0.001
		Post-hoc		T1 v T14	183.904 s				21.855 s	<0.001
		Post-hoc		T1 v T15	196.941 s				24.824 s	<0.001
		Univariate	Distance			3.516	14	294		<0.001	0.999
		Post-hoc		T1 v T2	3.950 m				1.489 m	1
		Post-hoc		T1 v T3	6.302 m				1.209 m	0.004
		Post-hoc		T1 v T4	6.127 m				1.436 m	0.036
		Post-hoc		T1 v T5	7.124 m				1.219 m	0.001
		Post-hoc		T1 v T6	6.161 m				1.326 m	0.015
		Post-hoc		T1 v T7	6.810 m				1.309 m	0.004
		Post-hoc		T1 v T8	6.326 m				1.214 m	0.004
		Post-hoc		T1 v T9	6.026 m				1.372 m	0.027
		Post-hoc		T1 v T10	7018 m				0.973 m	<0.001
		Post-hoc		T1 v T11	5.380 m				1.224 m	0.026
		Post-hoc		T1 v T12	6.445 m				1.140 m	0.001
		Post-hoc		T1 v T13	6.363 m				1.363 m	0.014
		Post-hoc		T1 v T14	5.120 m				1.997 m	1
		Post-hoc		T1 v T15	5.123 m				1.568 m	0.386
	Trial*Mass	Multivariate				1.767	28	588		0.009	0.994
		Univariate	Latency			2.954	14	294		<0.001	0.995
		Univariate	Distance			1.679	14	294		0.0559	0.893
	Trial* Age	Multivariate				0.986	28	588		0.488	0.855
		Univariate	Latency			1.473	14	294		0.12	0.838
		Univariate	Distance			1.227	14	294		0.255	0.745
	Trial*Sex	Multivariate				1.222	28	588		0.202	0.937
		Univariate	Latency			1.019	14	294		0.434	0.641
		Univariate	Distance			0.953	14	294		0.502	0.604
	Trial*Colony	Multivariate				0.702	28	588		0.873	0.668
		Univariate	Latency			1.055	14	294		0.399	0.661
		Univariate	Distance			1.055	14	294		0.523	0.593
	Trial*Sex*Colony	Multivariate				0.705	28	588		0.87	0.671
		Univariate	Latency			0.833	14	294		0.633	0.531
		Univariate	Distance			0.671	14	294		0.802	0.425
Colony	Factors	Test	Measure	Trial Contrasts	Mean Difference*	F	df	Error df	Std. Error	Sig.	Observed Power
Colony A	Trial	Multivariate				0.848	28	224		0.689	0.748
		Univariate	Latency			1.294	14	112		0.222	0.74
		Post-hoc		T1 v T2	83.788 s				48.314 s	1
		Post-hoc		T1 v T3	173.350 s				30.811 s	0.052
		Post-hoc		T1 v T4	169.606 s				45.751 s	0.628
		Post-hoc		T1 v T5	197.340 s				32.897 s	0.034
		Post-hoc		T1 v T6	169.393 s				42.436 s	0.42
		Post-hoc		T1 v T7	183.464 s				35.401 s	0.088
		Post-hoc		T1 v T8	160.712 s				35.515 s	0.203
		Post-hoc		T1 v T9	156.091 s				36.007 s	0.262
		Post-hoc		T1 v T10	183.710 s				26.412 s	0.012
		Post-hoc		T1 v T11	187.141 s				37.942 s	0.12
		Post-hoc		T1 v T12	195.865 s				36.591 s	0.072
		Post-hoc		T1 v T13	191.941 s				35.402 s	0.066
		Post-hoc		T1 v T14	198.852 s				31.248 s	0.023
		Post-hoc		T1 v T15	195.050 s				41.234 s	0.156
		Univariate	Distance			0.85	14	112		0.614	0.51
		Post-hoc		T1 v T2	3.658 m				2.559 m	1
		Post-hoc		T1 v T3	6.655 m				1.273 m	0.084
		Post-hoc		T1 v T4	6.445 m				2.354 m	1
		Post-hoc		T1 v T5	7.425 m				1.5487 m	0.143
		Post-hoc		T1 v T6	4.831 m				2.181 m	1
		Post-hoc		T1 v T7	6.134 m				1.871 m	1
		Post-hoc		T1 v T8	5.387 m				2.118 m	1
		Post-hoc		T1 v T9	4.526 m				1.963 m	1
		Post-hoc		T1 v T10	6.451 m				1.280 m	0.105
		Post-hoc		T1 v T11	5.865 m				1.800 m	1
		Post-hoc		T1 v T12	4.679 m				1.1615 m	1
		Post-hoc		T1 v T13	4.901 m				1.864 m	1
		Post-hoc		T1 v T14	5.478 m				6.556 m	1
		Post-hoc		T1 v T15	5.336 m				2.150 m	1
	Trial*Mass	Multivariate				0.888	28	224		0.632	0.774
		Univariate	Latency			1.103	14	112		0.363	0.651
		Univariate	Distance			0.948	14	112		0.51	0.567
	Trial* Age	Multivariate				0.823	28	224		0.724	0.731
		Univariate	Latency			1.171	14	112		0.307	0.685
		Univariate	Distance			0.807	14	112		0.66	0.484
	Trial*Rank	Multivariate				0.792	28	224		0.765	0.708
		Univariate	Latency			1.109	14	112		0.44	0.607
		Univariate	Distance			0.79	14	112		0.678	0.473
	Trial*Sex	Multivariate				0.748	28	224		0.819	0.674
		Univariate	Latency			0.619	14	112		0.844	0.366
		Univariate	Distance			1.052	14	112		0.409	0.624
Colony	Factors	Test	Measure	Trial Contrasts	Mean Difference*	F	df	Error df	Std. Error	Sig.	Observed Power
Colony B	Trial	Multivariate				0.89	28	252		0.63	0.78
		Univariate	Latency			1.472	14	126		0.131	0.813
		Post-hoc		T1 v T2	82.061 s				29.206 s	1
		Post-hoc		T1 v T3	144.477 s				29.664 s	0.093
		Post-hoc		T1 v T4	161.977 s				27.598 s	0.025
		Post-hoc		T1 v T5	171.461 s				32.004 s	0.048
		Post-hoc		T1 v T6	198.552 s				26.797 s	0.004
		Post-hoc		T1 v T7	196.756 s				26.950 s	0.005
		Post-hoc		T1 v T8	206.525 s				27.051 s	0.003
		Post-hoc		T1 v T9	211.062 s				28.925 s	0.005
		Post-hoc		T1 v T10	208.725 s				24.534 s	0.001
		Post-hoc		T1 v T11	159.731 s				31.977 s	0.078
		Post-hoc		T1 v T12	217.680 s				27.151 s	0.002
		Post-hoc		T1 v T13	214.856 s				27.840 s	0.003
		Post-hoc		T1 v T14	198.421 s				35.501 s	0.111
		Post-hoc		T1 v T15	189.767 s				333.243 s	0.031
		Multivariate	Distance			0.368	14	126		0.982	0.215
		Post-hoc		T1 v T2	4.519 m				1.746 m	1
		Post-hoc		T1 v T3	6.057 m				1.601 m	0.455
		Post-hoc		T1 v T4	5.894 m				1.665 m	0.664
		Post-hoc		T1 v T5	6.991 m				1.903 m	0.538
		Post-hoc		T1 v T6	7.615 m				1.646 m	0.131
		Post-hoc		T1 v T7	7.497 m				1.904 m	0.359
		Post-hoc		T1 v T8	7.221 m				1.471 m	0.088
		Post-hoc		T1 v T9	7.902 m				1.795 m	0.18
		Post-hoc		T1 v T10	7.667 m				1.566 m	0.089
		Post-hoc		T1 v T11	4.739 m				1.501 m	1
		Post-hoc		T1 v T12	7.980 m				1.750 m	0.143
		Post-hoc		T1 v T13	7.443 m				1.745 m	0.22
		Post-hoc		T1 v T14	5.106 m				2.314 m	1
		Post-hoc		T1 v T15	4.789 m				2.463 m	1
	Trial*Mass	Multivariate				1.712	28	252		0.017	0.99
		Univariate	Latency			2.318	14	126		0.007	0.967
		Univariate	Distance			0.951	14	126		0.507	0.575
	Trial* Age	Multivariate				1.131	28	252		0.303	0.869
		Univariate	Latency			1.521	14	126		0.113	0.829
		Univariate	Distance			0.849	14	126		0.615	0.515
	Trial*Rank	Multivariate				0.722	28	252		0.848	0.659
		Univariate	Latency			0.98	14	126		0.478	0.591
		Univariate	Distance			0.228	14	126		0.998	0.141
	Trial*Sex	Multivariate				0.826	28	252		0.72	0.738
		Univariate	Latency			0.933	14	126		0.526	0.565
		Univariate	Distance			0.717	14	126		0.754	0.432
Supplelmentary Table 1. MANOVA Results with Trial as the Repeated Measure. To investigate differences in the learning phase of the continuous maze for the combined colony analysis, a Repeated Measures Multivariate Analysis of Variance (MANOVA), using body mass and age as covariates; sex and colony as fixed factors; and trial as a repeated measure was used to model effects on latency and distance.…
