# Supplementary material for: Spatial Learning and Memory in the Naked Mole-Rat: Evolutionary Adaptations to a Subterranean Niche
Source: Frontiers journal article supplement (doi:10.3389/fevo.2022.879989), 2022-06-16
Supplement: Table_2.XLSX [file Table_2.XLSX]

## Sheet: Sheet1
Colony	Factors	Test	Measure	Day Contrasts	Trial Contrasts	Mean Difference*	F	df	Error df	Std. Error	Sig.	Observed Power
Combined	Day	Multivariate					1.457	4	84		0.223	0.434
		Univariate	Latency				0.939	2	42		0.399	0.202
		Post-hoc		D1 v D2		70.376 s				9.981 s	<0.001
		Post-hoc		D1 v D3		76.556 s				11.523 s	<0.001
		Univariate	Distance				2.627	2	42		0.084	0.494
		Post-hoc		D1 v D2		1.768 m				0.440 m	0.002
		Post-hoc		D1 v D3		0.986 m				0.784 m	0.667
	Trial	Multivariate					3.732	8	168		<0.001	0.985
		Univariate	Latency				5.494	4	84		0.001	0.97
		Post-hoc			T1 v T2	40.777 s				9.863 s	0.005
		Post-hoc			T1 v T3	63.531 s				7.178 s	<0.001
		Post-hoc			T1 v T4	56.919 s				11.554 s	0.001
		Post-hoc			T1 v T5	71.626 s				10.791 s	<0.001
		Univariate	Distance				2.809	4	84		0.031	0.745
		Post-hoc			T1 v T2	1.888 m				0.601 m	0.049
		Post-hoc			T1 v T3	2.483 m				0.611 m	0.006
		Post-hoc			T1 v T4	1.910 m				0.824 m	0.305
		Post-hoc			T1 v T5	2.574 m				0.705 m	0.015
	Day*Trial	Multivariate					3.534	16	336		<0.001	1
		Univariate	Latency				6.006	8	168		<0.001	1
		Univariate	Distance				4.084	8	168		<0.001	0.992
	Day*Mass	Multivariate					1.946	4	84		0.11	0.564
		Univariate	Latency				4.137	2	42		0.023	0.7
		Univariate	Distance				1.047	2	42		0.36	0.221
	Day*Age	Multivariate					0.841	4	84		0.503	0.258
		Univariate	Latency				1.106	2	42		0.34	0.231
		Univariate	Distance				0.905	2	42		0.412	0.196
	Day*Sex	Multivariate					0.278	4	84		0.891	0.109
		Univariate	Latency				0.226	2	42		0.799	0.083
		Univariate	Distance				0.045	2	42		0.956	0.056
	Day*Colony	Multivariate					1.297	4	84		0.278	0.389
		Univariate	Latency				2.346	2	42		0.108	0.449
		Univariate	Distance				1.809	2	42		0.176	0.357
	Trial*Mass	Multivariate					0.633	8	168		0.749	0.287
		Univariate	Latency				0.838	4	84		0.505	0.257
		Univariate	Distance				0.316	4	84		0.866	0.118
	Trial*Age	Multivariate					1.509	8	168		0.157	0.663
		Univariate	Latency				2.202	4	84		0.076	0.625
		Univariate	Distance				2.58	4	84		0.043	0.704
	Trial*Sex	Multivariate					1.554	8	168		0.142	0.679
		Univariate	Latency				1.039	4	84		0.392	0.315
		Univariate	Distance				0.662	4	84		0.62	0.208
	Trial*Colony	Multivariate					0.691	8	168		0.699	0.313
		Univariate	Latency				0.782	4	84		0.54	0.241
		Univariate	Distance				1.144	4	84		0.342	0.345
	Day*Trial*Mass	Multivariate					1.988	16	336		0.013	0.965
		Univariate	Latency				3.245	8	168		0.002	0.967
		Univariate	Distance				2.398	8	168		0.018	0.886
	Day*Trial*Age	Multivariate					0.825	16	336		0.657	0.569
		Univariate	Latency				1.35	8	168		0.222	0.604
		Univariate	Distance				0.843	9	168		0.566	0.384
	Day*Trial*Sex	Multivariate					1.603	16	336		0.066	0.908
		Univariate	Latency				1.345	8	168		0.225	0.602
		Univariate	Distance				1.375	8	168		0.211	0.614
	Day*Trial*Colony	Multivariate					0.509	16	336		0.942	0.343
		Univariate	Latency				0.617	8	168		0.763	0.28
		Univariate	Distance				0.552	8	168		0.816	0.25
	Day*Sex*Colony	Multivariate					0.854	4	84		0.495	0.262
		Univariate	Latency				1.431	2	42		0.25	0.289
		Univariate	Distance				0.045	2	42		0.956	0.056
	Trial*Sex*Colony	Multivariate					0.711	8	168		0.682	0.323
		Univariate	Latency				0.899	4	84		0.469	0.274
		Univariate	Distance				1.456	4	84		0.223	0.434
	Day*Trial*Sex*Colony	Multivariate					0.477	16	336		0.957	0.32
		Univariate	Latency				0.557	8	168		0.812	0.253
		Univariate	Distance				0.601	8	168		0.776	0.272
	Factors	Test	Measure	Day Contrasts	Trial Contrasts	Mean Difference*	F	df	Error df	Std. Error	Sig.	Observed Power
Colony A	Day	Multivariate					0.505	4	32		0.732	0.154
		Univariate	Latency				0.716	2	16		0.504	0.15
		Post-hoc		D1 v D2		45.857 s				10.652 s	0.008
		Post-hoc		D1 v D3		68.923 s				15.221 s	0.006
		Univariate	Distance				0.085	2	16		0.919	0.061
		Post-hoc		D1 v D2		0.629 m				0.820 m	1
		Post-hoc		D1 v D3		0.415 m				1.451 m	1
	Trial	Multivariate					1.38	8	64		0.222	0.578
		Univariate	Latency				2.78	4	32		0.043	0.696
		Post-hoc			T1 v T2	35.457 s				14.978 s	0.454
		Post-hoc			T1 v T3	56.479 s				11.600 s	0.012
		Post-hoc			T1 v T4	55.995 s				14.014 s	0.04
		Post-hoc			T1 v T5	73.179 s				6.929 s	<0.001
		Univariate	Distance				2.311	4	32		0.079	0.604
		Post-hoc			T1 v T2	1.258 m				0.930 m	1
		Post-hoc			T1 v T3	2.082 m				0.905 m	0.504
		Post-hoc			T1 v T4	1.918 m				1.029 m	0.993
		Post-hoc			T1 v T5	2.838 m				0.568 m	0.011
	Day*Trial	Multivariate					0.845	16	128		0.633	0.55
		Univariate	Latency				1.128	8	64		0.357	0.478
		Univariate	Distance				0.781	8	64		0.621	0.33
	Day*Mass	Multivariate					0.369	4	32		0.829	0.123
		Univariate	Latency				0.49	2	16		0.621	0.117
		Univariate	Distance				0.512	2	16		0.609	0.12
	Day*Age	Multivariate					0.551	4	32		0.699	0.165
		Univariate	Latency				0.989	2	16		0.393	0.192
		Univariate	Distance				0.415	2	16		0.667	0.106
	Day*Rank	Multivariate					0.74	4	32		0.572	0.212
		Univariate	Latency				0.738	2	16		0.494	0.153
		Univariate	Distance				0.01	2	16		0.99	0.051
	Day*Sex	Multivariate					0.139	4	32		0.967	0.075
		Univariate	Latency				0.083	2	16		0.92	0.061
		Univariate	Distance				0.022	2	16		0.978	0.053
	Trial*Mass	Multivariate					1.172	8	64		0.33	0.497
		Univariate	Latency				1.07	4	32		0.388	0.298
		Univariate	Distance				1.011	4	32		0.416	0.282
	Trial*Age	Multivariate					1.331	8	64		0.245	0.559
		Univariate	Latency				2.684	4	32		0.049	0.679
		Univariate	Distance				2.152	4	32		0.097	0.569
	Trial*Rank	Multivariate					1.312	8	64		0.254	0.552
		Univariate	Latency				2.082	4	32		0.106	0.553
		Univariate	Distance				2.57	4	32		0.057	0.657
	Trial*Sex	Multivariate					1.495	8	64		0.177	0.62
		Univariate	Latency				1.144	4	32		0.354	0.317
		Univariate	Distance				2.364	4	32		0.074	0.615
	Day* Trial*Mass	Multivariate					0.964	16	128		0.499	0.623
		Univariate	Latency				1.283	8	64		0.268	0.541
		Univariate	Distance				1.098	8	64		0.376	0.466
	Day*Trial*Age	Multivariate					0.825	16	128		0.656	0.536
		Univariate	Latency				0.887	8	64		0.533	0.376
		Univariate	Distance				0.625	8	64		0.754	0.264
	Day*Trial*Rank	Multivariate					0.643	16	128		0.843	0.414
		Univariate	Latency				0.863	8	64		0.5552	0.366
		Univariate	Distance				0.648	8	64		0.734	0.274
	Day*Trial*Sex	Multivariate					0.77	16	128		0.717	0.5
		Univariate	Latency				0.653	8	64		0.73	0.276
		Univariate	Distance				1.119	8	64		0.363	0.475
	Factors	Test	Measure	Day Contrasts	Trial Contrasts	Mean Difference*	F	df	Error df	Std. Error	Sig.	Observed Power
Colony B	Day	Multivariate					0.308	4	36		0.87	0.111
		Univariate	Latency				0.349	2	18		0.71	0.097
		Post-hoc		D1 v D2		45.857 s				10.652 s	0.008
		Post-hoc		D1 v D3		68.923 s				15.221 s	0.006
		Univariate	Distance				0.087	2	18		0.917	0.061
		Post-hoc		D1 v D2		0.629 m				0.820 m	1
		Post-hoc		D1 v D3		0.415 m				1.451 m	1
	Trial	Multivariate					0.282	8	72		0.97	0.133
		Univariate	Latency				0.14	4	36		0.966	0.076
		Post-hoc			T1 v T2	46.071 s				15.413 s	0.152
		Post-hoc			T1 v T3	69.192 s				12.336 s	0.003
		Post-hoc			T1 v T4	61.059 s				18.378 s	0.089
		Post-hoc			T1 vs T5	70.557 s				20.220 s	0.068
		Univariate	Distance				0.119	4	36		0.975	0.072
		Post-hoc			T1 v T2	2.457 m				0.920 m	0.218
		Post-hoc			T1 v T3	2.789 m				0.745 m	0.046
		Post-hoc			T1 v T4	2.182 m				1.131 m	0.858
		Post-hoc			T1 vs T5	2.364 m				1.357 m	1
	Day*Trial	Multivariate					1.474	16	144		0.117	0.855
		Univariate	Latency				2.81	8	72		0.009	0.919
		Univariate	Distance				0.604	8	72		0.772	0.258
	Day*Mass	Multivariate					2.71	4	36		0.045	0.691
		Univariate	Latency				6.735	2	18		0.007	0.864
		Univariate	Distance				0.244	2	18		0.786	0.083
	Day*Age	Multivariate					2.32	4	36		0.076	0.614
		Univariate	Latency				3.57	2	18		0.049	0.586
		Univariate	Distance				1.436	2	18		0.264	0.267
	Day*Rank	Multivariate					0.092	4	36		0.984	0.067
		Univariate	Latency				0.069	2	18		0.933	0.059
		Univariate	Distance				0.033	2	18		0.967	0.054
	Day*Sex	Multivariate					0.534	4	36		0.712	0.163
		Univariate	Latency				0.8	2	18		0.465	0.165
		Univariate	Distance				0.429	2	18		0.658	0.109
	Trial*Mass	Multivariate					0.985	8	72		0.455	0.423
		Univariate	Latency				0.763	4	36		0.556	0.221
		Univariate	Distance				0.751	4	36		0.564	0.218
	Trial*Age	Multivariate					0.689	8	72		0.699	0.295
		Univariate	Latency				0.271	4	36		0.894	0.103
		Univariate	Distance				0.513	4	36		0.727	0.158
	Trial*Rank	Multivariate					0.371	8	72		0.933	0.165
		Univariate	Latency				0.065	4	36		0.992	0.062
		Univariate	Distance				0.367	4	36		0.83	0.124
	Trial*Sex	Multivariate					0.79	8	72		0.613	0.339
		Univariate	Latency				0.469	4	36		0.758	0.148
		Univariate	Distance				0.384	4	36		0.818	0.128
	Day*Trial*Mass	Multivariate					1.246	16	144		0.24	0.772
		Univariate	Latency				1.664	8	72		0.122	0.684
		Univariate	Distance				1.327	8	72		0.244	0.564
	Day*Trial*Age	Multivariate					0.81	16	144		0.673	0.532
		Univariate	Latency				1.575	8	72		0.147	0.655
		Univariate	Distance				0.7898	8	72		0.606	0.342
	Day*Trial*Rank	Multivariate					1.239	16	144		0.246	0.769
		Univariate	Latency				1.952	8	72		0.065	0.767
		Univariate	Distance				0.23	8	72		0.984	0.115
	Day*Trial*Sex	Multivariate					1.059	16	144		0.4	0.682
		Univariate	Latency				1.299	8	72		0.258	0.554
		Univariate	Distance				1	8	72		0.444	0.43
Supplelmentary Table 2. MANOVA Results with Day and Trial as Repeated Measures. To investigate differences in the learning phase of the continuous maze for the combined colony analysis, a Reapeated Measures Multivariate Analysis of Variance (MANOVA), using body mass and age as covariates; sex and colony as fixed factors; and day and trial as repeated measures was used to model effects on latency …
