# Supplementary material for: Spatial Learning and Memory in the Naked Mole-Rat: Evolutionary Adaptations to a Subterranean Niche
Source: Frontiers journal article supplement (doi:10.3389/fevo.2022.879989), 2022-06-16
Supplement: Table_3.XLSX [file Table_3.XLSX]

## Sheet: Sheet1
Colony	Factors	Test	Measure	Trial Contrasts	Mean Difference*	F	df	Error df	Std. Error	Sig.	Observed Power
Combined	Trial	Univariate	Speed			3.272	14	294		<0.001	0.998
		Post-hoc		T1 v T2	-0.004 m/s				0.004 m/s	1
		Post-hoc		T1 v T3	-0.027 m/s				0.009 m/s	0.774
		Post-hoc		T1 v T4	-0.033 m/s				0.008 m/s	0.089
		Post-hoc		T1 v T5	-0.035 m/s				0.010 m/s	0.26
		Post-hoc		T1 v T6	-0.061 m/s				0.013 m/s	0.018
		Post-hoc		T1 v T7	-0.044 m/s				0.013 m/s	0.255
		Post-hoc		T1 v T8	-0.047 m/s				0.009 m/s	0.0022
		Post-hoc		T1 v T9	-0.052 m/s				0.009 m/s	0.001
		Post-hoc		T1 v T10	-0.053 m/s				0.009 m/s	<0.001
		Post-hoc		T1 v T11	-0.043 m/s				0.006 m/s	<0.001
		Post-hoc		T1 v T12	-0.080 m/s				0.001 m/s	<0.001
		Post-hoc		T1 v T13	-0.076 m/s				0.001 m/s	<0.001
		Post-hoc		T1 v T14	-0.069 m/s				0.011 m/s	<0.001
		Post-hoc		T1 v T15	-0.077 m/s				0.009 m/s	<0.001
	Trial*Mass	Univariate	Speed			0.668	14	294		0.805	0.423
	Trial* Age	Univariate	Speed			0.526	14	294		0.917	0.328
	Trial*Sex	Univariate	Speed			2.811	14	294		0.001	0.993
	Trial*Colony	Univariate	Speed			0.394	14	294		0.976	0.242
	Trial*Sex*Colony	Univariate	Speed			0.252	14	294		0.998	0.159
Colony	Factors	Test	Measure	Trial Contrasts	Mean Difference*	F	df	Error df	Std. Error	Sig.	Observed Power
Colony A	Trial	Univariate	Speed			0.577	14	112		0.878	0.34
		Post-hoc		T1 v T2	-0.006 m/s				0.005 m/s	1
		Post-hoc		T1 v T3	-0.021m/s				0.007 m/s	1
		Post-hoc		T1 v T4	-0.035 m/s				0.012 m/s	1
		Post-hoc		T1 v T5	-0.037 m/s				0.008 m/s	0.23
		Post-hoc		T1 v T6	-0.056 m/s				0.023 m/s	1
		Post-hoc		T1 v T7	-0.044 m/s				0.011 m/s	0.558
		Post-hoc		T1 v T8	-0.045 m/s				0.015 m/s	1
		Post-hoc		T1 v T9	-0.051 m/s				0.017 m/s	1
		Post-hoc		T1 v T10	-0.054 m/s				0.015 m/s	0.751
		Post-hoc		T1 v T11	-0.050 m/s				0.01 m/s	0.089
		Post-hoc		T1 v T12	-0.084 m/s				0.016 m/s	0.084
		Post-hoc		T1 v T13	-0.079 m/s				0.018 m/s	0.207
		Post-hoc		T1 v T14	-0.069 m/s				0.014 m/s	0.09
		Post-hoc		T1 v T15	-0.083 m/s				0.017 m/s	0.15
	Trial*Mass	Univariate	Speed			0.948	14	112		0.51	0.567
	Trial* Age	Univariate	Speed			0.846	14	112		0.618	0.507
	Trial*Rank	Univariate	Speed			0.797	14	112		0.67	0.478
	Trial*Sex	Univariate	Speed			0.893	14	112		0.568	0.536
Colony	Factors	Test	Measure	Trial Contrasts	Mean Difference*	F	df	Error df	Std. Error	Sig.	Observed Power
Colony B	Trial	Univariate	Speed			2.114	14	126		0.015	0.948
		Post-hoc		T1 v T2	-0.004 m/s				0.007 m/s	1
		Post-hoc		T1 v T3	-0.038 m/s				0.015 m/s	1
		Post-hoc		T1 v T4	-0.036 m/s				0.011 m/s	1
		Post-hoc		T1 v T5	-0.036 m/s				0.017 m/s	1
		Post-hoc		T1 v T6	-0.066 m/s				0.014 m/s	0.098
		Post-hoc		T1 v T7	-0.043 m/s				0.024 m/s	1
		Post-hoc		T1 v T8	-0.052 m/s				0.008 m/s	0.09
		Post-hoc		T1 v T9	-0.055 m/s				0.009 m/s	0.02
		Post-hoc		T1 v T10	-0.055 m/s				0.008 m/s	0.012
		Post-hoc		T1 v T11	-0.035 m/s				0.009 m/s	0.344
		Post-hoc		T1 v T12	-0.074 m/s				0.015 m/s	0.09
		Post-hoc		T1 v T13	-0.075 m/s				0.013 m/s	0.026
		Post-hoc		T1 v T14	-0.072 m/s				0.019 m/s	0.38
		Post-hoc		T1 v T15	-0.071 m/s				0.009 m/s	0.004
	Trial*Mass	Univariate	Speed			0.87	14	126		0.592	0.528
	Trial* Age	Univariate	Speed			0.407	14	126		0.971	0.238
	Trial*Rank	Univariate	Speed			2.162	14	126		0.013	0.954
	Trial*Sex	Univariate	Speed			1.748	14	126		0.054	0.889
Supplementary Table 3. ANOVA with Trial as the Repeated Measure. To investigate differences in the learning phase of the continuous maze for the combined colony analysis, a Repeated Measures Analysis of Variance (ANOVA), using body mass and age as covariates; sex and colony as fixed factors; and trial as a repeated measure was used to model effects on speed. Combined colony estimated marginal mea…
