# Supplementary material for: Spatial Learning and Memory in the Naked Mole-Rat: Evolutionary Adaptations to a Subterranean Niche
Source: Frontiers journal article supplement (doi:10.3389/fevo.2022.879989), 2022-06-16
Supplement: Table_4.XLSX [file Table_4.XLSX]

## Sheet: Sheet1
Colony	Factors	Test	Measure	Day Contrasts	Trial Contrasts	Mean Difference*	F	df	Error df	Std. Error	Sig.	Observed Power
Combined	Day	Univariate	Speed				5.567	2	42		0.007	0.83
		Post-hoc		D1 v D2		-0.031 m/s				0.006 m/s	<0.001
		Post-hoc		D1 v D3		-0.049 m/s				0.008 m/s	<0.001
	Trial	Univariate	Speed				2.396	4	84		0.0507	0.667
		Post-hoc			T1 v T2	-0.008 m/s				0.007 m/s	1
		Post-hoc			T1 v T3	-0.016 m/s				0.007 m/s	0.445
		Post-hoc			T1 v T4	-0.016 m/s				0.007 m/s	0.226
		Post-hoc			T1 v T5	-0.200 m/s				0.007 m/s	0.074
	Day*Trial	Univariate	Speed				2.4	8	168		0.018	0.886
	Day*Mass	Univariate	Speed				0.016	2	42		0.984	0.052
	Day*Age	Univariate	Speed				0.104	2	42		0.902	0.065
	Day*Sex	Univariate	Speed				0.91	2	42		0.41	0.197
	Day*Colony	Univariate	Speed				0.323	2	42		0.725	0.098
	Trial*Mass	Univariate	Speed				1.017	4	84		0.403	0.309
	Trial*Age	Univariate	Speed				1.007	4	84		0.409	0.305
	Trial*Sex	Univariate	Speed				3.698	4	84		0.008	0.866
	Trial*Colony	Univariate	Speed				0.83	4	84		0.51	0.255
	Day*Trial*Mass	Univariate	Speed				0.86	8	168		0.551	0.392
	Day*Trial*Age	Univariate	Speed				0.511	8	168		0.847	0.232
	Day*Trial*Sex	Univariate	Speed				3.443	8	168		0.001	0.976
	Day*Trial*Colony	Univariate	Speed				0.196	8	168		0.991	0.108
	Day*Sex*Colony	Univariate	Speed				0.477	2	168		0.624	0.123
	Trial*Sex*Colony	Univariate	Speed				0.085	4	168		0.987	0.067
	Day*Trial*Sex*Colony	Univariate	Speed				0.21	8	168		0.989	0.113
	Factors	Test	Measure	Day Contrasts	Trial Contrasts	Mean Difference*	F	df	Error df	Std. Error	Sig.	Observed Power
Colony A	Day	Univariate	Speed				0.3744	2	16		0.694	0.1
		Post-hoc		D1 v D2		-0.030 m/s				0.008 m/s	0.013
		Post-hoc		D1 v D3		-0.053 m/s				0.011 m/s	0.003
	Trial	Univariate	Speed				0.339	4	32		0.85	0.116
		Post-hoc			T1 v T2	-0.009 m/s				0.009 m/s	1
		Post-hoc			T1 v T3	-0.013 m/s				0.012 m/s	1
		Post-hoc			T1 v T4	-0.016 m/s				0.012 m/s	1
		Post-hoc			T1 v T5	-0.023 m/s				0.012 m/s	1
	Day*Trial	Univariate	Speed				0.866	8	64		0.55	0.367
	Day*Mass	Univariate	Speed				0.507	2	16		0.611	0.119
	Day*Age	Univariate	Speed				0.063	2	16		0.939	0.058
	Day*Rank	Univariate	Speed				0.779	2	16		0.475	0.159
	Day*Sex	Univariate	Speed				0.316	2	16		0.734	0.092
	Trial*Mass	Univariate	Speed				1.179	4	32		0.339	0.326
	Trial*Age	Univariate	Speed				0.947	4	32		0.45	0.265
	Trial*Rank	Univariate	Speed				0.507	4	32		0.731	0.155
	Trial*Sex	Univariate	Speed				1.325	4	32		0.282	0.365
	Day* Trial*Mass	Univariate	Speed				1.136	8	64		0.352	0.482
	Day*Trial*Age	Univariate	Speed				1.36	8	64		0.231	0.571
	Day*Trial*Rank	Univariate	Speed				0.981	8	64		0.459	0.417
	Day*Trial*Sex	Univariate	Speed				1.063	8	64		0.4	0.451
	Factors	Test	Measure	Day Contrasts	Trial Contrasts	Mean Difference*	F	df	Error df	Std. Error	Sig.	Observed Power
Colony B	Day	Univariate	Speed				2.222	2	18		0.137	0.393
		Post-hoc		D1 v D2		-0.031 m/s				0.008 m/s	0.008
		Post-hoc		D1 v D3		-0.043 m/s				0.012 m/s	0.02
	Trial	Univariate	Speed				2.076	4	36		0.104	0.56
		Post-hoc			T1 v T2	-0.006 m/s				0.011 m/s	1
		Post-hoc			T1 v T3	-0.021 m/s				0.007 m/s	0.163
		Post-hoc			T1 v T4	-0.020 m/s				0.007 m/s	0.145
		Post-hoc			T1 v T5	-0.020 m/s				0.008 m/s	0.402
	Day*Trial	Univariate	Speed				2.085	8	72		0.048	0.8
	Day*Mass	Univariate	Speed				0.191	2	18		0.827	0.075
	Day*Age	Univariate	Speed				0.461	2	18		0.556	0.1
	Day*Rank	Univariate	Speed				2.834	2	18		0.085	0.486
	Day*Sex	Univariate	Speed				0.755	2	18		0.484	0.158
	Trial*Mass	Univariate	Speed				0.537	4	36		0.684	0.141
	Trial*Age	Univariate	Speed				0.464	4	36		0.762	0.146
	Trial*Rank	Univariate	Speed				1.433	4	36		0.243	0.399
	Trial*Sex	Univariate	Speed				1.805	4	36		0.149	0.495
	Day*Trial*Mass	Univariate	Speed				1.379	8	72		0.221	0.584
	Day*Trial*Age	Univariate	Speed				0.349	8	72		0.827	0.116
	Day*Trial*Rank	Univariate	Speed				2.261	8	72		0.032	0.837
	Day*Trial*Sex	Univariate	Speed				2.181	8	72		0.039	0.821
Supplelmentary Table 4. ANOVA Results with Day and Trial as Repeated Measures. To investigate differences in the learning phase of the continuous maze for the combined colony analysis, a Reapeated Measures Analysis of Variance (ANOVA), using body mass and age as covariates; sex and colony as fixed factors; and day and trial as repeated measures was used to model effects on speed. Combined colony …
